# Supplementary material for: Dietary Patterns, Cardiometabolic and Lifestyle Variables in Greeks with Obesity and Metabolic Disorders
Source: MDPI journal article supplement (doi:10.3390/nu14235064), 2022-11-28
Supplement: s1 [file s1]

**Supplementary Table S1.** Food groups and food items.

|    | Food Groups                          | Food Items (69)                                                                                                                                                                                          |
|----|--------------------------------------|----------------------------------------------------------------------------------------------------------------------------------------------------------------------------------------------------------|
| 1  | Dairy (High-fat)                     | High fat milk/yogurt   Yellow cheese/cream cheese   White cheese (e.g. feta cheese)   Ice-cream/milk-shake/cream/rice pudding                                                                            |
| 2  | Dairy (Low-fat)                      | Low fat milk/yogurt   Low fat cheese (light/ cottage)                                                                                                                                                    |
| 3  | Eggs                                 |                                                                                                                                                                                                          |
| 4  | Refined grains                       | White bread/toast   white rice   Pasta/ pearl barley   Potatoes boiled/baked/mashed                                                                                                                      |
| 5  | Whole grains                         | Whole meal bread/rusk   brown rice   Whole meal pasta                                                                                                                                                    |
| 6  | Fast Food                            | Toasted sandwich/sandwich   burger-bread   French fried potatoes                                                                                                                                         |
| 7  | Red Meat                             | Veal (steak, filet)   Burger/ meat balls/ minced-meat   Pork (steak, filet)   Lamb/goat/game/ lamb-chops   Pastitsio/moysakas/papoytsakia                                                                |
| 8  | Processed Meat                       | Sausage / bacon   Light/no fat cold sliced meats   Cold sliced meats                                                                                                                                     |
| 9  | Poultry                              | Chicken/turkey (all kind)                                                                                                                                                                                |
| 10 | Fish                                 | Small fish   large fish   sea-food (octopus, sleeve-fish, prawns)                                                                                                                                        |
| 11 | Pulses                               | Pulses (lentils, beans, chickpeas)                                                                                                                                                                       |
| 12 | Vegetables   cooked mixed vegetables | Tomato/cucumber/carrot/pepper   Broccoli/cauliflower/courgetti   Lettuce/cabbage/spinach/rocket   Greens/celery/spinach   Spinach-rice/ cabbage-rice   Petit pois (peas) / green beans / okra /artichoke |
| 13 | Fruits   fruit juices                | Orange   Apple/pear   Other winter-fruits   banana   Other summer – fruits   fruit juice                                                                                                                 |
| 14 | Dried fruits                         |                                                                                                                                                                                                          |
| 15 | Nuts                                 |                                                                                                                                                                                                          |
| 16 | Pies                                 | Home made pies (e.g. Cheese-pie, spinach-pie)   Pies                                                                                                                                                     |
| 17 | Sweets                               | Sweets made in tray   Sweet preserves/stewed fruit/fruit – jelly   Gateau/tart   Croissant/gofer/cake/biscuits   chocolate   Honey/marmalade/sugar   Cereal/cereal bars                                  |
| 18 | Salty Snacks                         | Chips/pop-corn   crisp bread                                                                                                                                                                             |
| 19 | Olive oil   olives                   |                                                                                                                                                                                                          |
| 20 | Alcohol                              | Wine   Beer   other alcohol                                                                                                                                                                              |
| 21 | Soft drinks                          | Soft drinks   Light soft drinks                                                                                                                                                                          |
| 22 | Coffee and Tea                       | Coffee, Tea/other teas                                                                                                                                                                                   |
| 23 | Sauces                               | Mayonnaise/sauce   Light mayonnaise/light sauce                                                                                                                                                          |
| 24 | Seed oil                             |                                                                                                                                                                                                          |
| 25 | Animal & Hydrogenated Fats           | Butter   margarine                                                                                                                                                                                       |
